# Supplementary material for: Genome-Wide Association Mapping of Resistance to the Sugarcane Aphid in Sorghum bicolor
Source: Research Square preprint supplement (doi:10.21203/rs.3.rs-982658/v1), 2021-10-21
Supplement: Supplementary file 1 [file 26dc02859f0a677d6010f515.docx]

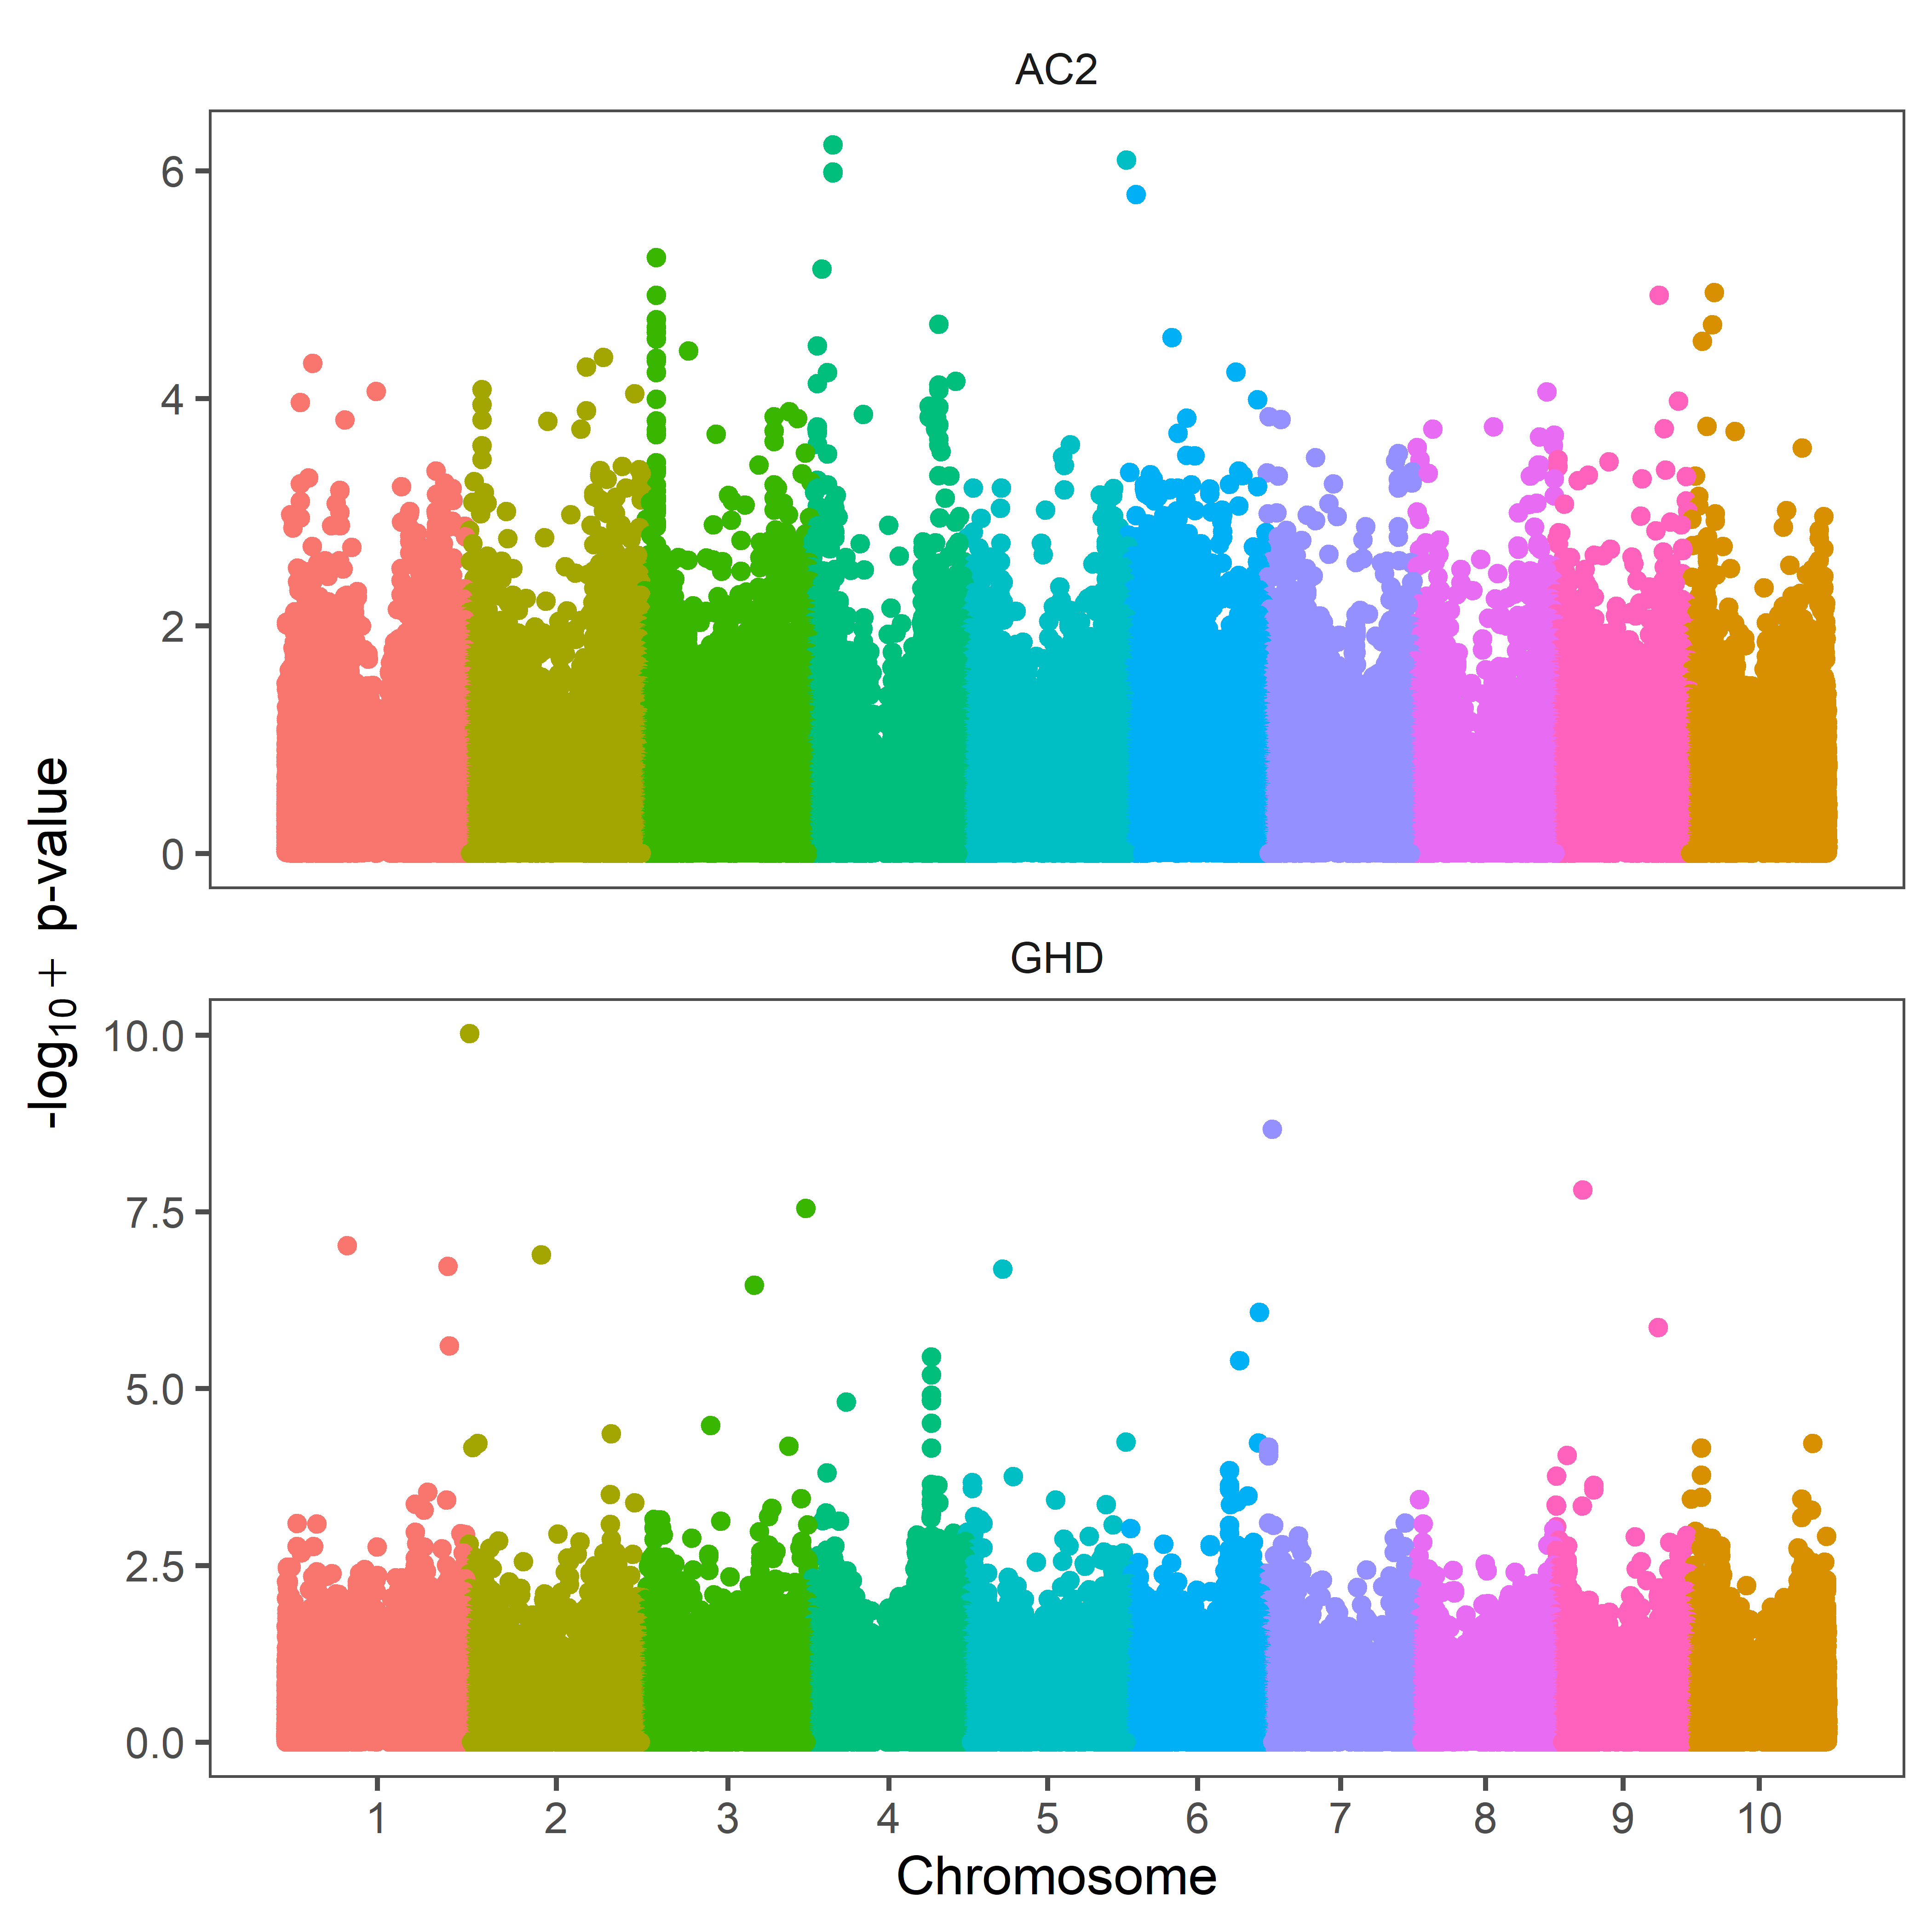


Supplementary **Fig. S2**. GWAS across 281 Sorghum Association Panel (SAP) accessions using 191,738 SNP markers. Manhattan plots showing significant false discovery rate (FDR) adjusted p-value ≤ 0.05 associated with AC2 Aphid count for second-rating dates and greenhouse damage (GHD) rating using single-run FarmCPU. Y-axis represents -log10 (raw) p-value and x-axis represents sorghum chromosome.
