# Supplementary material for: Genome-Wide Association Mapping of Resistance to the Sugarcane Aphid in Sorghum bicolor
Source: Research Square preprint supplement (doi:10.21203/rs.3.rs-982658/v1), 2021-10-21
Supplement: Supplementary file 3 [file 973f7c830c9e9a8e5466c69a.xlsx]

## Sheet: Supplementray Table S6_genomics
Aphid resistance genomic region identified with respect to Kiani and Szczepaniec, 2018
SL. No.	Marker_Name	Chr	Position	candidate_gene_count
1	S1_5101469	1	5101469	16
2	S1_61018734	1	61018734	15
3	S1_69017297	1	69017297	18
4	S1_71814479	1	71814479	16
5	S1_72391791	1	72391791	16
6	S1_7442679	1	7442679	15
7	S2_551409	2	551409	14
8	S3_69633709	3	69633709	12
9	S4_59580888	4	59580888	21
10	S5_3230535	5	3230535	11
11	S6_53836196	6	53836196	18
12	S6_58137478	6	58137478	18
13	S6_58686833	6	58686833	11
14	S7_2888228	7	2888228	16
15	S8_60394416	8	60394416	13
16	S9_1531143	9	1531143	13
17	S9_56657642	9	56657642	21
18	S10_2507813	10	2507813	16
19	S10_682016	10	682016	13
Aphid resistance genomic region identified with respect toTetreault et al. (2019) 16 modules
SL. No.	Marker_name	Chr	Position	Candidate gene count
1	S1_14448039	1	14448039	11
2	S1_5101469	1	5101469	22
3	S1_61018734	1	61018734	23
4	S1_69017297	1	69017297	32
5	S1_69943445	1	69943445	15
6	S1_71814479	1	71814479	29
7	S1_72391791	1	72391791	19
8	S1_7442679	1	7442679	24
9	S2_3203597	2	3203597	20
10	S2_551409	2	551409	21
11	S2_61431704	2	61431704	20
12	S2_887719	2	887719	14
13	S3_11473429	3	11473429	15
14	S3_69633709	3	69633709	20
15	S3_71926805	3	71926805	28
16	S4_53265404	4	53265404	15
17	S4_59580888	4	59580888	26
18	S4_9549591	4	9549591	11
19	S5_3230535	5	3230535	16
20	S5_579450	5	579450	14
21	S6_334458	6	334458	12
22	S6_53836196	6	53836196	22
23	S6_58137478	6	58137478	20
24	S6_58686833	6	58686833	20
25	S6_60922873	6	60922873	25
26	S7_2494675	7	2494675	20
27	S7_2888228	7	2888228	16
28	S7_5475915	7	5475915	14
29	S7_6208175	7	6208175	11
30	S7_638972	7	638972	19
31	S8_60394416	8	60394416	16
32	S9_1531143	9	1531143	15
33	S9_3054933	9	3054933	18
34	S9_45483935	9	45483935	12
35	S9_49705844	9	49705844	14
36	S9_56657642	9	56657642	30
37	S10_2507813	10	2507813	25
38	S10_57134221	10	57134221	15
39	S10_682016	10	682016	18
40	S10_8350074	10	8350074	14
